# Supplementary material
Source: PubMed Central journal article supplement (PMC5986086)
Supplement: NIHMS958900-supplement-supplement_1.pdf [file NIHMS958900-supplement-supplement_1.pdf]

Online Table 1. Sex hormone levels associated with CVD risk factors<sup>\*,†,‡</sup>

|                                                  | Total T (nmol/L)         | Estradiol (nmol/L)          | Total T / Estradiol         | DHEA (nmol/L)            | SHBG (nmol/L)               |
|--------------------------------------------------|--------------------------|-----------------------------|-----------------------------|--------------------------|-----------------------------|
| <b>Hypertension</b>                              | 0.02 (-0.03, 0.07)       | <b>0.16 (0.11, 0.22)</b>    | <b>-0.14 (-0.22, -0.07)</b> | 0.01 (-0.03, 0.05)       | <b>-0.06 (-0.10, -0.02)</b> |
| <b>Diabetes</b>                                  | 0.03 (-0.05, 0.10)       | <b>0.10 (0.02, 0.19)</b>    | -0.08 (-0.18, 0.03)         | -0.05 (-0.11, 0.01)      | <b>-0.25 (-0.30, -0.19)</b> |
| <b>Current smoking</b>                           | <b>0.15 (0.07, 0.23)</b> | <b>-0.09 (-0.18, -0.00)</b> | <b>0.24 (0.12, 0.35)</b>    | <b>0.12 (0.06, 0.19)</b> | 0.02 (-0.04, 0.08)          |
| <b>BMI <math>\geq 30</math> kg/m<sup>2</sup></b> | <b>0.15 (0.09, 0.20)</b> | <b>0.24 (0.18, 0.29)</b>    | <b>-0.09 (-0.17, -0.01)</b> | <b>0.05 (0.00, 0.09)</b> | <b>-0.29 (-0.34, -0.25)</b> |
| <b>eGFR &lt;60 mL/min/1.73 m<sup>2</sup></b>     | -0.03 (-0.09, 0.04)      | 0.06 (-0.01, 0.13)          | -0.09 (-0.18, 0.00)         | -0.06 (-0.11, -0.01)     | -0.02 (-0.07, 0.03)         |
| <b>Physical activity, met-min/wk</b>             | 0.00 (-0.01, 0.02)       | -0.02 (-0.04, 0.00)         | 0.02 (-0.00, 0.05)          | -0.01 (-0.02, 0.01)      | <b>0.02 (0.00, 0.03)</b>    |
| <b>Total cholesterol, per 10 mg/dl</b>           | -0.01 (-0.01, 0.00)      | 0.00 (-0.01, 0.01)          | -0.01 (-0.02, 0.00)         | <b>0.01 (0.01, 0.02)</b> | -0.00 (-0.01, 0.00)         |
| <b>CRP</b>                                       | <b>0.04 (0.02, 0.06)</b> | <b>0.13 (0.11, 0.15)</b>    | <b>-0.09 (-0.12, -0.06)</b> | <b>0.04 (0.02, 0.06)</b> | <b>-0.08 (-0.10, -0.06)</b> |
| <b>Fibrinogen</b>                                | <b>0.24 (0.11, 0.37)</b> | 0.13 (-0.01, 0.27)          | 0.11 (-0.08, 0.29)          | <b>0.19 (0.08, 0.29)</b> | <b>-0.34 (-0.44, -0.24)</b> |
| <b>D-dimer</b>                                   | 0.03 (-0.00, 0.06)       | -0.01 (-0.04, 0.03)         | 0.03 (-0.01, 0.07)          | -0.02 (-0.04, 0.00)      | 0.01 (-0.01, 0.03)          |
| <b>IL-6</b>                                      | <b>0.11 (0.07, 0.15)</b> | <b>0.15 (0.11, 0.19)</b>    | -0.04 (-0.10, 0.01)         | 0.01 (-0.02, 0.04)       | <b>-0.14 (-0.17, -0.11)</b> |

\*Abbreviations: CVD, cardiovascular disease; T, testosterone; DHEA, dehydroepiandrosterone; SHBG, sex hormone binding globulin; BMI, body mass index; eGFR; estimated glomerular filtration rate; CRP, C-reactive protein; IL-6, interleukin-6.

†All sex-hormones are dependent variables and log-transformed. CRP, fibrinogen, D-dimer and IL-6 were log-transformed. Physical activity was modeled as log(score + 1).

‡Model was adjusted for age (year, continuous), race/ethnicity (white, black, Hispanic, and Chinese), study site (CA, MN, NY, IL, NC, and MD), education (<high school, high school, >high school), and hormone therapy (yes, no).

**Online Table 2. Hazard Ratios (95% CI) for hard CVD, hard CHD, HFpEF, HFrfEF and ischemic stroke associated with sex hormone levels.<sup>\*,†</sup>**

| <b>Hard CVD</b>                                                           |                          |                          |                          |
|---------------------------------------------------------------------------|--------------------------|--------------------------|--------------------------|
| <b>(N events / N total = 213 / 2,834; IR = 6.9 per 1000 person-years)</b> |                          |                          |                          |
|                                                                           | Model 1 ‡                | Model 2 §                | Model 3                  |
| <b>Total T (nmol/L)</b>                                                   | <b>1.20 (1.05, 1.37)</b> | <b>1.18 (1.03, 1.35)</b> | <b>1.17 (1.02, 1.34)</b> |
| <b>Bioavailable T (nmol/L)</b>                                            | <b>1.23 (1.06, 1.42)</b> | <b>1.16 (1.00, 1.34)</b> | 1.13 (0.97, 1.32)        |
| <b>Free T (Percent)</b>                                                   | 1.17 (0.99, 1.39)        | 1.07 (0.89, 1.28)        | 1.00 (0.82, 1.21)        |
| <b>Estradiol (nmol/L)</b>                                                 | 0.97 (0.80, 1.16)        | 0.92 (0.76, 1.11)        | 0.88 (0.72, 1.06)        |
| <b>Total T / estradiol ratio</b>                                          | <b>1.21 (1.02, 1.44)</b> | <b>1.24 (1.04, 1.48)</b> | <b>1.29 (1.07, 1.56)</b> |
| <b>DHEA (nmol/L)</b>                                                      | 1.01 (0.87, 1.16)        | 0.96 (0.84, 1.11)        | 0.94 (0.81, 1.08)        |
| <b>SHBG (nmol/L)</b>                                                      | 0.84 (0.71, 0.99)        | 0.92 (0.77, 1.09)        | 0.98 (0.81, 1.18)        |
| <b>Hard CHD</b>                                                           |                          |                          |                          |
| <b>(N events / N total= 119 / 2,834; IR = 3.8 per 1000 person-years)</b>  |                          |                          |                          |
|                                                                           | Model 1 ‡                | Model 2 §                | Model 3                  |
| <b>Total T (nmol/L)</b>                                                   | 1.19 (0.99, 1.43)        | 1.17 (0.97, 1.40)        | 1.17 (0.98, 1.41)        |
| <b>Bioavailable T (nmol/L)</b>                                            | 1.17 (0.96, 1.43)        | 1.09 (0.90, 1.34)        | 1.07 (0.87, 1.31)        |
| <b>Free T (Percent)</b>                                                   | 1.06 (0.85, 1.34)        | 0.93 (0.73, 1.19)        | 0.83 (0.64, 1.08)        |
| <b>Estradiol (nmol/L)</b>                                                 | 0.82 (0.64, 1.04)        | <b>0.76 (0.59, 0.97)</b> | <b>0.69 (0.53, 0.88)</b> |
| <b>Total T / estradiol ratio</b>                                          | 1.36 (1.08, 1.72)        | <b>1.42 (1.12, 1.81)</b> | <b>1.57 (1.22, 2.02)</b> |
| <b>DHEA (nmol/L)</b>                                                      | 0.98 (0.81, 1.18)        | 0.93 (0.77, 1.13)        | 0.95 (0.78, 1.15)        |
| <b>SHBG (nmol/L)</b>                                                      | 0.92 (0.74, 1.16)        | 1.05 (0.83, 1.33)        | 1.18 (0.91, 1.52)        |
| <b>Ischemic stroke</b>                                                    |                          |                          |                          |
| <b>(N events / N total= 88 / 2,834; IR = 2.8 per 1000 person-years)</b>   |                          |                          |                          |
|                                                                           | Model 1 ‡                | Model 2 §                | Model 3                  |
| <b>Total T (nmol/L)</b>                                                   | 1.22 (0.98, 1.51)        | 1.20 (0.96, 1.49)        | 1.17 (0.94, 1.46)        |
| <b>Bioavailable T (nmol/L)</b>                                            | <b>1.31 (1.04, 1.65)</b> | 1.25 (0.99, 1.58)        | 1.21 (0.94, 1.54)        |
| <b>Free T (Percent)</b>                                                   | <b>1.40 (1.05, 1.85)</b> | 1.30 (0.97, 1.75)        | 1.24 (0.90, 1.72)        |
| <b>Estradiol (nmol/L)</b>                                                 | 1.17 (0.86, 1.60)        | 1.13 (0.83, 1.54)        | 1.11 (0.80, 1.55)        |
| <b>Total T / estradiol ratio</b>                                          | 1.08 (0.82, 1.43)        | 1.10 (0.83, 1.46)        | 1.10 (0.81, 1.48)        |
| <b>DHEA (nmol/L)</b>                                                      | 1.02 (0.81, 1.29)        | 0.98 (0.78, 1.24)        | 0.91 (0.72, 1.15)        |
| <b>SHBG (nmol/L)</b>                                                      | <b>0.72 (0.55, 0.94)</b> | 0.77 (0.58, 1.02)        | 0.80 (0.58, 1.09)        |

\*Abbreviations: CVD, cardiovascular disease; CHD, coronary heart disease; IR, incidence rates; HFpEF, heart failure with preserved ejection fraction; HFrfEF, heart failure with reduced ejection fraction; T, testosterone; DHEA, dehydroepiandrosterone; SHBG, sex hormone binding globulin; HDL, high density lipoprotein; eGFR, estimated glomerular filtration rate; CRP, C-reactive protein; IL-6, interleukin-6.

†All sex-hormones are log-transformed and standardized. Hazard Ratios are associated with 1 SD increase in log sex hormones.

‡Model 1: adjusts for age (year, continuous), race/ethnicity (white, black, Hispanic, and Chinese), study site (CA, MN, NY, IL, NC, and MD), and use of hormone therapy (yes, no).

§Model 2: model 1 + education (<high school, high school, >high school), waist to hip ratio (continuous), physical activity, and smoking (never, former, current).

Model 3: model 2 + systolic blood pressure (mmHg, continuous), use of antihypertensive medications (yes, no), total cholesterol (mg/dl, continuous), HDL-cholesterol (mg/dl, continuous), use of lipid lowering medications (yes, no), diabetes (yes, no), eGFR (mL/min/1.73 m<sup>2</sup>), CRP (mg/l, log-transformed continuous), IL-6 (pg/ml, log-transformed, continuous), fibrinogen (mg/dl, log-transformed continuous), D-dimer (ug/ml, log-transformed continuous).

ACCEPTED MANUSCRIPT

**Online Table 3. Hazard Ratios (95% CI) for all CVD, CHD and HF associated with sex hormone levels (all sex hormones included in the same model).<sup>\*,†,‡</sup>**

|                           | <b>CVD</b>               | <b>CHD</b>               | <b>HF</b>         |
|---------------------------|--------------------------|--------------------------|-------------------|
| <b>Total T (nmol/L)</b>   | <b>1.20 (1.06, 1.36)</b> | <b>1.29 (1.09, 1.51)</b> | 1.19 (0.96, 1.47) |
| <b>Estradiol (nmol/L)</b> | 0.93 (0.79, 1.11)        | <b>0.74 (0.60, 0.91)</b> | 0.79 (0.60, 1.03) |
| <b>DHEA (nmol/L)</b>      | 0.88 (0.77, 1.00)        | 0.91 (0.77, 1.09)        | 0.84 (0.68, 1.04) |
| <b>SHBG (nmol/L)</b>      | 1.06 (0.90, 1.25)        | 1.23 (0.99, 1.52)        | 1.08 (0.81, 1.42) |

\*Abbreviations: CVD, cardiovascular disease; CHD, coronary heart disease; IR, incident rates; HF, heart failure; T, testosterone; DHEA, dehydroepiandrosterone; SHBG, sex hormone binding globulin; HDL, high density lipoprotein; eGFR; estimated glomerular filtration rate; CRP, C-reactive protein; IL-6, interleukin-6.

†All sex-hormones are log-transformed and standardized. Hazard Ratios are associated with 1 SD increase in log sex hormones.

‡Model adjusts for age (year, continuous), race/ethnicity (white, black, Hispanic, and Chinese), study site (CA, MN, NY, IL, NC, and MD), use of hormone therapy (yes, no), education (<high school, high school, >high school), waist to hip ratio (continuous), physical activity, smoking (never, former, current), systolic blood pressure (mmHg, continuous), use of antihypertensive medications (yes, no), total cholesterol (mg/dl, continuous), HDL-cholesterol (mg/dl, continuous), use of lipid lowering medications (yes, no), diabetes (yes, no), eGFR (mL/min/1.73 m<sup>2</sup>), CRP (mg/l, log-transformed continuous), IL-6 (pg/ml, log-transformed, continuous), fibrinogen (mg/dl, log-transformed continuous), D-dimer (ug/ml, log-transformed continuous).

**Online Table 4. Hazard Ratios (95% CI) for all CVD, CHD and HF associated with sex hormone levels excluding women taking hormone therapy (all sex hormones included in the same model).<sup>\*,†,‡</sup>**

|                           | <b>CVD</b>               | <b>CHD</b>               | <b>HF</b>                |
|---------------------------|--------------------------|--------------------------|--------------------------|
| <b>Total T (nmol/L)</b>   | <b>1.16 (1.00, 1.35)</b> | <b>1.25 (1.03, 1.52)</b> | <b>1.28 (1.00, 1.63)</b> |
| <b>Estradiol (nmol/L)</b> | 0.93 (0.75, 1.17)        | <b>0.70 (0.54, 0.92)</b> | 0.74 (0.53, 1.02)        |
| <b>DHEA (nmol/L)</b>      | 0.95 (0.81, 1.12)        | 1.05 (0.85, 1.30)        | 0.88 (0.68, 1.13)        |
| <b>SHBG (nmol/L)</b>      | 1.12 (0.91, 1.39)        | <b>1.36 (1.03, 1.80)</b> | 1.17 (0.83, 1.65)        |

\*Abbreviations: CVD, cardiovascular disease; CHD, coronary heart disease; IR, incident rates; HF, heart failure; T, testosterone; DHEA, dehydroepiandrosterone; SHBG, sex hormone binding globulin; HDL, high density lipoprotein; eGFR; estimated glomerular filtration rate; CRP, C-reactive protein; IL-6, interleukin-6.

†All sex-hormones are log-transformed and standardized. Hazard Ratios are associated with 1 SD increase in log sex hormones.

‡Model adjusts for age (year, continuous), race/ethnicity (white, black, Hispanic, and Chinese), and study site (CA, MN, NY, IL, NC, and MD), education (<high school, high school, >high school), waist to hip ratio (continuous), physical activity, and smoking (never, former, current), systolic blood pressure (mmHg, continuous), use of antihypertensive medications (yes, no), total cholesterol (mg/dl, continuous), HDL-cholesterol (mg/dl, continuous), use of lipid lowering medications (yes, no), diabetes (yes, no), eGFR (mL/min/1.73 m<sup>2</sup>), CRP (mg/l, log-transformed continuous), IL6 (pg/ml, log-transformed, continuous), fibrinogen (mg/dl, log-transformed continuous), D-dimer (ug/ml, log-transformed continuous).

**Online Table 5. Hazard Ratios (95% CI) for all CVD, CHD and HF associated with sex hormone levels in competing risk analysis: MESA 2000-2013<sup>\*,†</sup>**

| <b>All CVD</b>                                                           |                          |                          |                          |
|--------------------------------------------------------------------------|--------------------------|--------------------------|--------------------------|
| <b>(N events / N total= 283 / 2,834; IR = 9.3 per 1000 person-years)</b> |                          |                          |                          |
|                                                                          | Model 1 <sup>‡</sup>     | Model 2 <sup>§</sup>     | Model 3 <sup>  </sup>    |
| <b>Total T (nmol/L)</b>                                                  | <b>1.23 (1.09, 1.39)</b> | <b>1.21 (1.07, 1.37)</b> | <b>1.21 (1.07, 1.37)</b> |
| <b>Bioavailable T (nmol/L)</b>                                           | <b>1.28 (1.12, 1.46)</b> | <b>1.21 (1.05, 1.39)</b> | <b>1.19 (1.03, 1.38)</b> |
| <b>Free T (Percent)</b>                                                  | 1.21 (1.02, 1.42)        | 1.10 (0.93, 1.30)        | 1.03 (0.85, 1.24)        |
| <b>Estradiol (nmol/L)</b>                                                | 1.06 (0.88, 1.27)        | 1.01 (0.84, 1.22)        | 0.97 (0.80, 1.18)        |
| <b>DHEA (nmol/L)</b>                                                     | 1.00 (0.87, 1.13)        | 0.96 (0.85, 1.09)        | 0.95 (0.83, 1.08)        |
| <b>SHBG (nmol/L)</b>                                                     | <b>0.83 (0.70, 0.97)</b> | 0.90 (0.76, 1.07)        | 0.97 (0.81, 1.16)        |
| <b>All CHD</b>                                                           |                          |                          |                          |
| <b>(N events / N total= 171 / 2,834; IR = 5.5 per 1000 person-years)</b> |                          |                          |                          |
|                                                                          | Model 1 <sup>‡</sup>     | Model 2 <sup>§</sup>     | Model 3 <sup>  </sup>    |
| <b>Total T (nmol/L)</b>                                                  | <b>1.31 (1.10, 1.56)</b> | <b>1.30 (1.09, 1.54)</b> | <b>1.31 (1.10, 1.56)</b> |
| <b>Bioavailable T (nmol/L)</b>                                           | <b>1.31 (1.09, 1.57)</b> | <b>1.23 (1.02, 1.48)</b> | <b>1.22 (1.01, 1.47)</b> |
| <b>Free T (Percent)</b>                                                  | 1.13 (0.92, 1.40)        | 1.00 (0.81, 1.24)        | 0.92 (0.73, 1.15)        |
| <b>Estradiol (nmol/L)</b>                                                | 0.92 (0.74, 1.16)        | 0.87 (0.69, 1.10)        | 0.80 (0.64, 1.01)        |
| <b>DHEA (nmol/L)</b>                                                     | 0.98 (0.82, 1.16)        | 0.94 (0.80, 1.11)        | 0.95 (0.81, 1.12)        |
| <b>SHBG (nmol/L)</b>                                                     | 0.88 (0.72, 1.08)        | 1.00 (0.81, 1.24)        | 1.10 (0.88, 1.38)        |
| <b>All HF</b>                                                            |                          |                          |                          |
| <b>(N events / N total= 103 / 2,834; IR = 3.3 per 1000 person-years)</b> |                          |                          |                          |
|                                                                          | Model 1 <sup>‡</sup>     | Model 2 <sup>§</sup>     | Model 3 <sup>  </sup>    |
| <b>Total T (nmol/L)</b>                                                  | <b>1.26 (1.00, 1.59)</b> | 1.23 (0.98, 1.56)        | 1.25 (0.98, 1.60)        |
| <b>Bioavailable T (nmol/L)</b>                                           | <b>1.36 (1.09, 1.69)</b> | <b>1.32 (1.05, 1.65)</b> | <b>1.31 (1.04, 1.67)</b> |
| <b>Free T (Percent)</b>                                                  | 1.23 (0.91, 1.66)        | 1.18 (0.87, 1.61)        | 1.12 (0.79, 1.58)        |
| <b>estradiol (nmol/L)</b>                                                | 0.94 (0.65, 1.34)        | 0.92 (0.64, 1.32)        | 0.84 (0.60, 1.18)        |
| <b>DHEA (nmol/L)</b>                                                     | 0.83 (0.67, 1.03)        | 0.81 (0.65, 1.00)        | 0.84 (0.68, 1.05)        |
| <b>SHBG (nmol/L)</b>                                                     | 0.81 (0.60, 1.08)        | 0.84 (0.62, 1.14)        | 0.89 (0.63, 1.25)        |

\* Abbreviations: CVD, cardiovascular disease; CHD, coronary heart disease; HF, heart failure; IR, Incidence Rates; T, Testosterone; DHEA, Dehydroepiandrosterone; SHBG, Sex Hormone Binding Globulin;

† Mortality due to non-CVD causes as competing risks. All sex-hormones are log-transformed and standardized. Hazard Ratios are associated with 1 SD increase in log sex hormones. Bolded results are statistically significant.

‡ Model 1: adjusts for age (year, continuous), race/ethnicity (white, black, Hispanic, and Chinese), study site (CA, MN, NY, IL, NC, and MD), and use of hormone therapy (yes, no).

§ Model 2: model 1 + education (<high school, high school, >high school), waist to hip ratio (continuous), physical activity, and smoking (never, former, current).

|| Model 3: model 2 + systolic blood pressure (mmHg, continuous), use of antihypertensive medications (yes, no), total cholesterol (mg/dl, continuous), HDL-cholesterol (mg/dl, continuous), use of lipid lowering medications (yes, no), diabetes (yes, no), eGFR (mL/min/1.73 m<sup>2</sup>), CRP (mg/l, log-transformed continuous), IL6 (pg/ml, log-transformed, continuous), fibrinogen (mg/dl, log-transformed continuous), D-dimer (ug/ml, log-transformed continuous).
